# Supplementary material for: The Role of miRNAs, miRNA Clusters, and isomiRs in Development of Cancer Stem Cell Populations in Colorectal Cancer
Source: PubMed Central journal article supplement (PMC7867000; doi:10.3390/ijms22031424), 2021-01-31
Supplement: ijms-22-01424-s001.pdf [file ijms-22-01424-s001.pdf]

### Supplementary Material

**Table S1. miRNAs predicted to target SC genes or genes involved in regulating SC functions**

| <u>miRNA</u>           | <u>Targets</u>                              | <u>Disease/Cancer</u>        | <u>Role</u>                                            | <u>Reference</u> |
|------------------------|---------------------------------------------|------------------------------|--------------------------------------------------------|------------------|
| miR-17-92 cluster      | APC gene                                    | colon                        | cancer progression                                     | 71               |
| miR-17-92 cluster      | TGF-Beta Pathway ↓                          | neuroblastoma                | cancer progression                                     | 72               |
| miR-17-92 cluster      | C-Myc                                       | colon                        | inhibits TGF-Beta and causes angiogenesis              | 73               |
| miR-17-92 cluster      | FGD4/LIMK1 /cyclin D1/SSH1                  | prostate                     | ↓ expression in Rho-GTPase pathway                     | 75               |
| miR-17-92 cluster      | PTEN/RB2                                    | lung                         | cluster overexpression in cancer                       | 65               |
| miR-17-92 cluster      | PTEN                                        | neurological diseases        | regulation of PTEN also affects degradation of neurons | 4                |
| miR-17-92 cluster      | PTEN                                        | cardiac disease              | cluster overexpression = cardiomyocyte proliferation   | 4                |
| miR-23b/27b/24 cluster | PDGF                                        | lung                         | affects KRAS and NF-Kb pathways                        | 95               |
| miR-23b/27b/24 cluster | FOXP2 ↓                                     | colon                        | downregulates FOXP2                                    | 91               |
| miR-23b/27b/24 cluster |                                             | breast                       | oncogene                                               | 96               |
| miR-23b/27b/24 cluster | ARGEF1                                      | colon                        | tumor suppression                                      | 98               |
| miR-23b/27b/24 cluster | anti-angiogenic proteins ↓                  | Choroidal neovascularization | angiogenesis                                           | 97               |
| miR-23b/27b/24 cluster | 5-Fluorouracil and Oxaliplatin Chemotherapy | colon                        | resist oxaliplatin treatment, EMT in cancer            | 93               |
| miR-17 family          |                                             | bone development             | regulates bone metabolism and formation                | 4                |

|          |                           |                             |                                                         |     |
|----------|---------------------------|-----------------------------|---------------------------------------------------------|-----|
| miR-18a  | APC gene                  | colon                       | highly expressed in tumors                              | 76  |
| miR-19   | PTEN                      | B-cell lymphomas            | KD of PTEN aids in cancer progression                   | 77  |
| miR-20   | CDKN1A/p21                | colon                       | tumorigenesis                                           | 4   |
| miR-92a  | KLF4 and AKT/mTOR pathway | glioma                      | cancer progression                                      | 79  |
| miR-92a  |                           | breast cancer               | ↓ miRNA expression in breast cancer cells               | 89  |
| miR-92a  | Dkk-3 gene                | colon                       | tumorigenesis                                           | 80  |
| miR-92a  | Bim ↓                     | colon                       | cancer progression                                      | 81  |
| miR-92a  | RECK ↓                    | colon                       | cancer progression                                      | 82  |
| miR-92a  | KLF4/GSK3-Beta/DKK-3      | colon                       | IL-6/STAT3 pathway ↑ miR-92a/Wnt/Beta-Catenin signaling | 83  |
| miR-92a  | BMP5 ↓                    | colon                       | tumorigenesis                                           | 84  |
| miR-92a  | LRIG1 ↓                   | colon                       | downregulates LRIG1                                     | 140 |
| miR-23b  | FOXP2                     | colon                       | pro-metastasis                                          | 91  |
| miR-23b  | TGFbR2 ↓                  | colon                       | cancer progression                                      | 100 |
| miR-23b  | uPA ↓                     | colon                       | cancer progression                                      | 100 |
| miR-23b  | MAP3K1 ↓                  | colon                       | cancer progression                                      | 100 |
| miR-23b  | PAK2 ↓                    | colon                       | cancer progression                                      | 100 |
| miR-23b  | FZD7 ↓                    | colon                       | cancer progression                                      | 100 |
| miR-23b  | BTBD7                     | colon                       | cancer metastasis                                       | 102 |
| miR-23b  | PDE7A ↓                   | colon                       | cancer progression                                      | 101 |
| miR-23b  | LGR5 ↓                    | colon                       | downregulates LGR5                                      | 139 |
| miR-27b  | GOLM1 ↓                   | castrate resistant prostate | cancer progression                                      | 94  |
| miR-27b  | FOXP2                     | colon                       | pro-metastasis                                          | 91  |
| miR-24   | FOXP2                     | colon                       | anti-metastasis                                         | 91  |
| miR-9-2  | CpG                       | melanoma                    | DNA Hypermethylation                                    | 44  |
| miR-9-3  | CpG                       | colon                       | DNA Hypermethylation                                    | 44  |
| miR-148a | CpG                       | colon                       | DNA Hypermethylation                                    | 44  |
| miR-196b | CpG                       | oral squamous               | DNA Hypomethylation                                     | 45  |
| miR-196b | FOS gene                  | lung                        | DNA Hypermethylation                                    | 52  |
| miR-221  | DNMT3b ↓                  | breast                      | cancer progression                                      | 46  |

|                |       |              |                        |    |
|----------------|-------|--------------|------------------------|----|
| miR-296-<br>5p | HMGA1 | glioblastoma | inhibits tumorigenesis | 47 |
|----------------|-------|--------------|------------------------|----|

**Table S2. Classification of miRNAs based on the miRNA clusters and isomiR**

| <u>Chromosome</u> | <u>Cluster</u>                                    | <u>Predicted SC Gene Targets</u>                                       | <u>TCGA: Normal vs CRC</u> |
|-------------------|---------------------------------------------------|------------------------------------------------------------------------|----------------------------|
| Chr3              | <sup>1</sup> hsa-mir-15b-5p<br>broadly conserved  | none                                                                   | ↓ p < 0.01                 |
|                   | hsa-mir-15b-3p                                    | ALDH1B1, 3B1, 7A1, 1A1, BMI1, LGR5, LGR4,                              | ↑ p < 0.01                 |
|                   | <sup>1</sup> hsa-mir-16-5p                        | LRIG1                                                                  | ↑ p < 0.01                 |
|                   | <sup>2</sup> hsa-mir-16-2-3p                      | ALCAM, ALDH1L2, 6A1, 1A2, 7A1, 1A3, 5A1, BMI, LGR5, LGR4, LRIG1, LRIG2 | ↑ p < 0.01                 |
| <hr/>             |                                                   |                                                                        |                            |
| Chr7              | <sup>3</sup> hsa-mir-106b-5p<br>Broadly conserved | None                                                                   | ↑ p < 0.01                 |
|                   | hsa-mir-106b-3p                                   | LGR4                                                                   | ↓ p < 0.01                 |
|                   | <sup>3</sup> hsa-mir-93-5p<br>Broadly conserved   | None                                                                   | NS                         |
|                   | hsa-mir-93 - 3p                                   | ALDH1A2, 5A1, LGR6, LRIG2                                              | NS                         |
|                   | hsa-mir-25-5p                                     | ALDH1B1, 5A1, 1L2, 6A1, LRIG2                                          | NS                         |
|                   | <sup>4</sup> hsa-mir-25-3p                        | None                                                                   | ↑ p < 0.01                 |
| <hr/>             |                                                   |                                                                        |                            |
| Chr7              | hsa-mir-183-5p.1                                  | BMI1                                                                   | ↑ p < 0.01                 |
|                   | hsa-mir-183-5p.2                                  | ALDH6A1, LRIG1                                                         | ↑ p < 0.01                 |
|                   | hsa-mir-183-3p                                    | ALDH1B1, 1A3, 6A1                                                      | NS                         |
|                   | <sup>5</sup> hsa-mir-96-5p                        | LRIG1                                                                  | ↑ p < 0.05                 |
|                   | hsa-mir-96-3p                                     | ALCAM, ALDH1B1, 1L2, LGR4, LGR5, LGR6                                  | NS                         |
|                   | hsa-mir-182-5p                                    | ALDH6A1, LRIG2                                                         | ↑ p < 0.01                 |
|                   | hsa-mir-182-3p                                    | ALDH1A2, 1A3, 5A1, 6A1, LRIG2, LRIG3                                   | NS                         |
| <hr/>             |                                                   |                                                                        |                            |

|             |                                     |                                                        |            |
|-------------|-------------------------------------|--------------------------------------------------------|------------|
| <b>Chr9</b> | hsa-mir-23b-5p                      | ALDH18A1, 7A1, 5A1, LGR4, LGR5, LRIG2, LRIG3           | ↓ p < 0.05 |
|             | hsa-mir-23b-3p<br>broadly conserved | ALDH1A2, 1L2, LRIG1, LRIG2                             | ↓ p < 0.01 |
|             | hsa-mir-27b-5p                      | ALDH1B1, 1A2, BMI1, LRIG2                              | ↑ p < 0.01 |
|             | hsa-mir-27-3p<br>broadly conserved  | ALDH4A1, 1L2, BMI1, LGR4                               | NS         |
|             | hsa-mir-3074-5p                     | ALCAM, ALDH2, 7A1, 5A1, 9A1, 1L2, BMI1, LRIG2, LRIG3   | ↓ p < 0.01 |
|             | hsa-mir-3074-3p                     | ALDH7A1, 1L2, 6A1, BMI1, LRIG2, LRIG3                  | NS         |
|             | hsa-mir-24-1-5p                     | ALDH1B1, 1A2, 3A2, 4A1, 7A1, 6A1, LRIG3                | ↓ p < 0.01 |
|             | hsa-mir-24-1-3p                     | ND                                                     | ↑ p < 0.01 |
| <hr/>       |                                     |                                                        |            |
| <b>Chr9</b> | <sup>6</sup> hsa-let-7a-1-5p        | None                                                   | p < 0.01   |
|             | <sup>7</sup> hsa-let-7a-1-3p        | ALDH1A3, 7A1, 5A1, BMI1, LGR4, LGR5, LRIG3             | p < 0.01   |
|             | <sup>6</sup> hsa-let-7f-1-5p        | LGR4                                                   | p < 0.01   |
|             | <sup>7</sup> hsa-let-7f-1-3p        | ALCAM, ALDH1L2                                         | NS         |
|             | <sup>6</sup> hsa-let-7d-5p          | ALDH6A1, LRIG2, LRIG3                                  | NS         |
|             | hsa-let-7d-3p                       | ALDH3A2, LRIG2                                         | p < 0.01   |
| <hr/>       |                                     |                                                        |            |
| Chr11       | <sup>8</sup> hsa-mir-100-5p         | None                                                   | NS         |
|             | hsa-mir-100-3p                      | ALCAM, ALDH1A1, 1B1, 7A1, 1L2, 6A1, LGR4, LRIG2, LRIG3 | NS         |
|             | hsa-mir-10526                       | ND                                                     | ND         |
|             | hsa-let-7a-2-5p                     | ND                                                     | p < 0.01   |
|             | <sup>9</sup> hsa-let-7a-2-3p        | ALDH8A1, 9A1, 1A2, BMI1, LGR4, LRIG1, LRIG3            | p < 0.01   |
| <hr/>       |                                     |                                                        |            |

|              |                                  |                                                          |            |
|--------------|----------------------------------|----------------------------------------------------------|------------|
| Chr12        | <sup>10</sup> hsa-mir-200c-5p    | ALCAM, BMI1, LRIG2, LRIG3                                | ↑ p < 0.01 |
|              | <sup>11</sup> hsa-mir-200c-3p    | None                                                     | ↓ p < 0.01 |
|              | hsa-mir-141-5p                   | ALCAM, ALDH8A1, 18A1, 1L1, LRIG2                         | ↑ p < 0.01 |
|              | <sup>12</sup> hsa-mir-141-3p     | None                                                     | ↑ p < 0.01 |
| <hr/>        |                                  |                                                          |            |
| <b>Chr13</b> | hsa-mir-17-5p broadly conserved  | None                                                     | ↑ p < 0.01 |
|              | hsa-mir-17-3p                    | ALDH1A1, 3B2, 5A1, 1A3, 3A2, 16A1, 7A1, 1L2, LGR4, LRIG2 | ↑ p < 0.01 |
|              | hsa-mir-18a-5p broadly conserved | ALCAM                                                    | NS         |
|              | hsa-mir-18a-3p                   | ALDH3A2, 5A1, 1A2, 6A1, 7A1, LRIG2                       | ↓ p < 0.05 |
|              | hsa-mir-19a-5p                   | ALDH1L2, BMI1, LGR4                                      | ND         |
|              | hsa-mir-19a-3p broadly conserved | LRIG1, LRIG3                                             | ND         |
|              | hsa-mir-20a-5p broadly conserved | LRIG1                                                    | ↑ p < 0.01 |
|              | hsa-mir-20a-3p                   | ALDH1A2, 3B1, 3A2                                        | ↑ p < 0.01 |
|              | hsa-mir-19b-1-5p                 | ALDH1A2, 8A1, 18A1                                       | ↑ p < 0.01 |
|              | hsa-mir-19b-1-3p                 | ND                                                       | ↑ p < 0.01 |
|              | hsa-mir-92a-1-5p                 | ALDH3B1, 1B1, 1A2, 6A1                                   | ↓ p < 0.01 |
|              | <sup>4</sup> hsa-mir-92a-1-3p    | None                                                     | ↓ p < 0.01 |
| <hr/>        |                                  |                                                          |            |
| Chr17        | hsa-mir-4736-5p                  | ALDH7A1, 3B2, 1L2, 5A1, 3A2, 6A1, 4A1, LRIG3             | NS         |
|              | hsa-mir-142-5p                   | ALCAM                                                    | ↑ p < 0.01 |

|       |                              |                                                               |            |
|-------|------------------------------|---------------------------------------------------------------|------------|
|       | hsa-mir-142-3p.1             | None                                                          | ↑ p < 0.01 |
|       | hsa-mir-142-3p.2             | ALCAM, ALDH1A3,                                               | ↑ p < 0.01 |
| <hr/> |                              |                                                               |            |
| Chr17 | hsa-mir-152-5p               | ALCAM, 1A3, 1A2, 7A1,3A2, 5A1, 6A1, LGR4, LRIG2, LRIG3        | NS         |
|       | <sup>13</sup> hsa-mir-152-3p | ALCAM                                                         | ↑ p < 0.01 |
|       | hsa-mir-10226                | ND                                                            | ND         |
| <hr/> |                              |                                                               |            |
| Chr19 | hsa-mir-23a-5p               | ALDH18A1, 7A1, 5A1, LGR4, LGR5, LRIG2, LRIG3                  | ↓ p < 0.05 |
|       | hsa-mir-23a-3p               | ALDH1L1, LRIG1                                                | ↑ p < 0.01 |
|       | hsa-mir-27a-5p               | ALDH1B1, 1A2, BMI, LRIG2                                      | ↑ p < 0.01 |
|       | hsa-mir-27a-3p               | ALDH4A1, 1L2, BMI, LGR4                                       | ↑ p < 0.01 |
|       | hsa-mir-24-2-5p              | 1B1, 1A2, 3A2, 4A1, 7A1, 6A1, LRIG3                           | ↑ p < 0.01 |
|       | hsa-mir-24-2-3p              | ND                                                            | ↑ p < 0.01 |
| <hr/> |                              |                                                               |            |
| Chr19 | <sup>8</sup> hsa-mir-99b-5p  | None                                                          | ↓ p < 0.01 |
|       | hsa-mir-99b-3p               | ALDH1A3, 7A1, LGR4, LRIG3                                     | ↓ p < 0.01 |
|       | <sup>6</sup> hsa-let-7e-5p   | None                                                          | p < 0.01   |
|       | hsa-let-7e-3p                | ALDH3A2,                                                      | p < 0.01   |
|       | hsa-mir-125a-5p              | None                                                          | ↓ p < 0.01 |
|       | hsa-mir-125a-3p              | ALDH3B1, 5A1, 3A2, 1L2, LRIG2                                 | ↓ p < 0.05 |
| <hr/> |                              |                                                               |            |
| Chr21 | <sup>8</sup> hsa-mir-99a-5p  | None                                                          |            |
|       | hsa-mir-99a-3p               | ALDH1A3, 7A1, LGR4, LRIG3                                     | ↑ p < 0.05 |
|       | <sup>6</sup> hsa-let-7c-5p   | None                                                          | p < 0.01   |
|       | hsa-let-7c-3p                | ALCAM, ALDH7A1, 9A1, 8A1, 1B1, BMI1, LGR4, LGR5, LRIG1, LRIG3 | NS         |

|                    |                                                |                                                                |           |
|--------------------|------------------------------------------------|----------------------------------------------------------------|-----------|
| Chr22              | <sup>6</sup> hsa-let-7a-3-5p                   | None                                                           | p<0.01    |
|                    | <sup>7</sup> hsa-let-7a-3-3p                   | None                                                           | p<0.01    |
|                    | hsa-mir-4763-5p                                | ALDH5A1, 1L1, 7A1, 3B1, 3A2, 8A1, 1A2, 2, BMI1, LRIG3          | NS        |
|                    | <sup>14</sup> hsa-mir-4763-3p                  | ALDH3B2, 4A1, 5A1, 7A1, 3A2, LRIG3                             | NS        |
|                    | hsa-let-7b-5p                                  | None                                                           | p<0.01    |
|                    | hsa-let-7b-3p                                  | None                                                           | p<0.01    |
| <b><u>ChrX</u></b> | <sup>3</sup> hsa-mir-106a-5p broadly conserved | None                                                           | ↑ p< 0.01 |
|                    | hsa-mir-106a-3p                                | ALDH1L2, 1L1, 6A1, 7A1                                         | NS        |
|                    | hsa-mir-18b-5p broadly conserved               | ALCAM                                                          | ND        |
|                    | hsa-mir-18b-3p                                 | ALDH6A1, LRIG2                                                 | ND        |
|                    | <sup>3</sup> hsa-mir-20b-5p broadly conserved  | None                                                           | NS        |
|                    | hsa-mir-20b-3p                                 | ALCAM, ALDH9A1, 1B1, 1A2, 3A2, 5A1, 1L2, 6A1, 7A1, LGR4, LRIG3 | NS        |
|                    | hsa-mir-19b-2-5p                               | ALDH1A2, 8A1, 18A1, 1L2, BMI1, LGR4                            | ND        |
|                    | hsa-mir-19b-2-3p                               | None                                                           | ND        |
|                    | hsa-mir-92a-2-5p                               | ALDH3B2, 5A1, 4A1, LGR4, LRIG2                                 | ND        |
|                    | <sup>4</sup> hsa-mir-92a-3p                    | None                                                           | ND        |
|                    | <sup>15</sup> hsa-mir-363-5p                   | ALDH3A1, 4A1, 3B1, BMI1, LRIG2                                 | ND        |
|                    | <sup>4</sup> hsa-mir-363-3p                    | None                                                           | ND        |
| <b><u>ChrX</u></b> | hsa-let-7f-2-5p                                | ND                                                             | P<0.01    |
|                    | <sup>16</sup> hsa-let-7f-2-3p                  | ALDH1A3, 3A2, 6A1, BMI1, LGR4, LRIG3                           | NS        |
|                    | <sup>6</sup> hsa-mir-98-5p                     | None                                                           | ↑ p< 0.01 |



| <sup>7</sup> hsa-mir-98-3p                                                                                                                                                                                                                                                                                                                                                                                                                                                                                                                                                                                                                                                                                                                                                                                                                                                                                                                                                                                                                                                                                                                                                                                                                                                                                                     | ALDH6A1, LRIG2 | NS |
|--------------------------------------------------------------------------------------------------------------------------------------------------------------------------------------------------------------------------------------------------------------------------------------------------------------------------------------------------------------------------------------------------------------------------------------------------------------------------------------------------------------------------------------------------------------------------------------------------------------------------------------------------------------------------------------------------------------------------------------------------------------------------------------------------------------------------------------------------------------------------------------------------------------------------------------------------------------------------------------------------------------------------------------------------------------------------------------------------------------------------------------------------------------------------------------------------------------------------------------------------------------------------------------------------------------------------------|----------------|----|
| <p>These miRNAs are also a member of the following broadly conserved families:</p> <p><sup>1</sup>miR-15-5p/16-5p/195-5p/424-5p/497-5p</p> <p><sup>2</sup>miR-16-2-3p/195-3p</p> <p><sup>3</sup>miR-17-5p/20-5p/93-5p/106-5p/519-3p</p> <p><sup>4</sup>miR-25-3p/32-5p/92-3p/363-3p/367-3p</p> <p><sup>5</sup>miR-96-5p/1271-5p</p> <p><sup>6</sup>let-7-5p/98-5p</p> <p><sup>7</sup>let-7a-3p/let-7b-3p/let-7f-1-3p/98-3p</p> <p><sup>8</sup>miR-99-5p/100-5p</p> <p><sup>9</sup>let-7a-2-3p/let-7g-3p</p> <p><sup>10</sup>miR-200c-5p/550a-3p</p> <p><sup>11</sup>miR-200bc-3p/429</p> <p><sup>12</sup>miR-141-3p/200a-3p</p> <p><sup>13</sup>miR-148-3p/152-3p</p> <p><sup>14</sup>miR-1207-5p/4763-3p</p> <p><sup>15</sup>mir-363-5p/6745</p> <p><sup>16</sup>let-7f-2-3p/1185-3p</p> <p>NS= not significant, ND= no data, <math>\uparrow</math> = increased expression in CRC, <math>\downarrow</math> = decreased expression in CRC</p> <p>Databases used: <a href="http://www.mirbase.org/">http://www.mirbase.org/</a> for identifying miRNA clusters, <a href="http://www.targetscan.org/vert_71/">http://www.targetscan.org/vert_71/</a> for identifying isomiRs and miRNA targets, <a href="http://mirtv.ibms.sinica.edu.tw/">http://mirtv.ibms.sinica.edu.tw/</a> for clinical data on miRNA and miRNA targets</p> |                |    |
